# Supplementary material for: Unexpected superhard phases of niobium triborides: first-principles calculations
Source: Royal Society of Chemistry journal article supplement (doi:10.1039/c6ra05162f), 2016-01-01
Supplement: c6ra05162f1.pdf [file c6ra05162f1.pdf]

**Supplementary Information for the paper entitled “Unexpected  
superhard phases of Niobium Triborides: first-principles  
calculations ”**

Xiaofeng Li †, Junyi Du

*College of Physics and Electronic Information, Luoyang Normal  
College, Henan Luoyang, 471022, PR China.*

## Supplementary information

The reliabilities of the pseudopotentials at high pressures are crosschecked with the full-potential linearized augmented plane-wave (LAPW) method as implemented in the WIEN2k code [1]. By using the two different methods, we calculate total energies of NbB<sub>3</sub> in the  $P6_3/mmm$  structure with varying pressures, and then fit the obtained energy-volume data into the Birch-Murnaghan equation of states. Figure S1 shows the resulted fitted equation of states. We can see the results derived from two methods are very small, which clearly indicates the suitability of the PAW pseudopotentials for describing the energetics of NbB<sub>3</sub> at pressures.

## Supplementary Figure

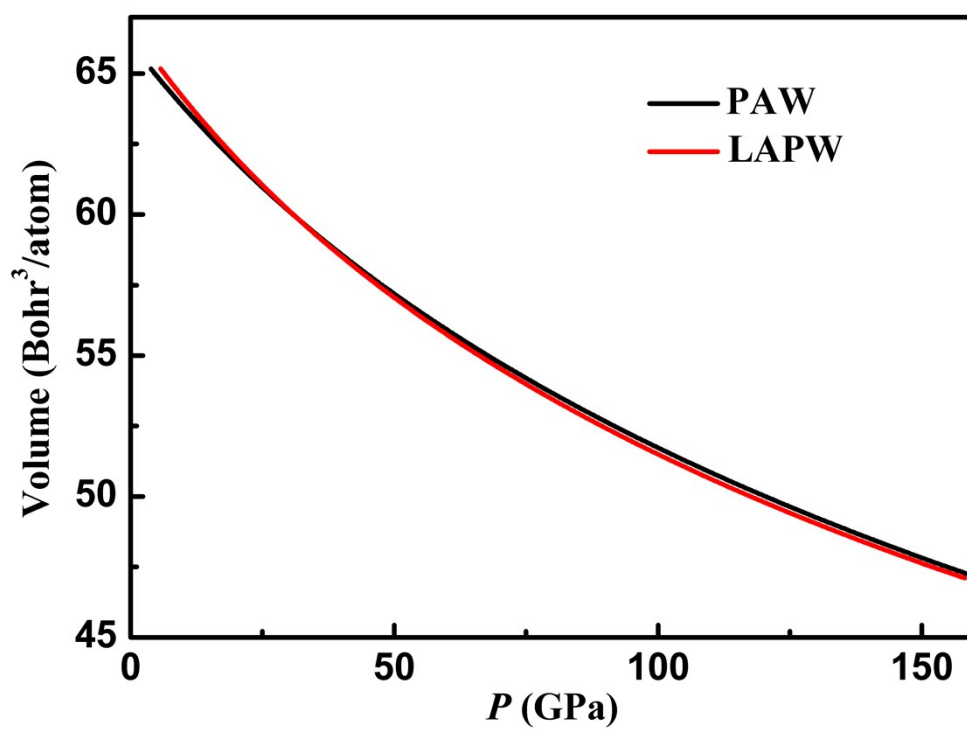

**Figure S1.** Comparison of the fitted Birch-Murnaghan equation of states for  $P6_3/mmm$  phase of NbB<sub>3</sub> by using the calculated results from the PAW pseudopotentials and the full-potential LAPW methods.

## Supplementary Table

Table S1 The lattice parameters and atomic positions of all the phases of NbB<sub>3</sub> ( the data in the bracket using by LDA method, other calculated by GGA method)

| Lattice parameters (Å)    |                                    |                  | Atomic coordinates |        |        |
|---------------------------|------------------------------------|------------------|--------------------|--------|--------|
| <i>C2/c</i>               | <i>a</i> =5.325 (5.267)            | B (8 <i>f</i> )  | 0.3328             | 0.7076 | 0.2499 |
|                           | <i>b</i> =3.064 (3.031)            | B (8 <i>f</i> )  | 0.8160             | 0.2928 | 0.9499 |
|                           | <i>c</i> =17.831 (17.596)          | B (8 <i>f</i> )  | 0.0108             | 0.1924 | 0.0499 |
|                           | $\alpha=\gamma=90^\circ$           | Nb (8 <i>f</i> ) | 0.5799             | 0.2073 | 0.3482 |
|                           | $\beta=104.5^\circ$ (105. 9)       |                  |                    |        |        |
| <i>P6<sub>3</sub>/mmm</i> | <i>a</i> = <i>b</i> =5.243 (5.192) | B (6 <i>f</i> )  | 0                  | 0.6716 | 0      |
|                           | <i>c</i> =3.246 (3.193)            | Nb (2 <i>d</i> ) | 0.3333             | 0.6667 | 0.5    |
| <i>C2/m</i>               | <i>a</i> =8.110 (7.959)            | B (4 <i>i</i> )  | 0.7881             | 0      | 0.4756 |
|                           | <i>b</i> =3.064 (3.005)            | B (4 <i>i</i> )  | 0.2524             | 0      | 0.7040 |
|                           | <i>c</i> =11.762 (11.561)          | B (4 <i>i</i> )  | 0.8062             | 0      | 0.1289 |
|                           | $\alpha=\gamma=90^\circ$           | Nb (4 <i>i</i> ) | 0.8597             | 0      | 0.1683 |
|                           | $\beta=149.8^\circ$ (150.1 °)      |                  |                    |        |        |
| <i>Pmm2</i>               | <i>a</i> =3.101 (3.064)            | B (4 <i>i</i> )  | 0                  | 0      | 0.2059 |
|                           | <i>b</i> =3.141 (3.105)            | B (4 <i>i</i> )  | 0.5                | 0.5    | 0.7025 |
|                           | <i>c</i> =7.246 (7.161)            | B (4 <i>i</i> )  | 0.5                | 0.5    | 0.9484 |
|                           | $\alpha=\gamma=90^\circ$           | B (4 <i>i</i> )  | 0                  | 0.5    | 0.3179 |
|                           | $\beta=149.8^\circ$ (150.1°)       | B (4 <i>i</i> )  | 0                  | 0.5    | 0.0729 |
|                           |                                    | B (4 <i>i</i> )  | 0                  | 0.5    | 0.5764 |
|                           |                                    | Nb (1 <i>a</i> ) | 0                  | 0      | 0.8320 |
|                           |                                    | Nb (1 <i>c</i> ) | 0.5                | 0      | 0.4625 |
| <i>I-4m2</i>              | <i>a</i> = <i>b</i> =3.119 (3.082) | B (4 <i>e</i> )  | 0                  | 0      | 0.6265 |
|                           |                                    | B (2 <i>c</i> )  | 0                  | 0.5    | 0.25   |
|                           |                                    | Nb (2 <i>a</i> ) | 0                  | 0      | 0      |

## Reference

- [1] P. Blaha, K. Schwarz, P. Sorantin and S.B. Trickey, Comput. Phys. Commun., 1990, **59**, 399.
